# Supplementary material
Source: PubMed Central journal article supplement (PMC3616438)
Supplement: cr201329x7.pdf [file cr201329x7.pdf]

## Supplementary information

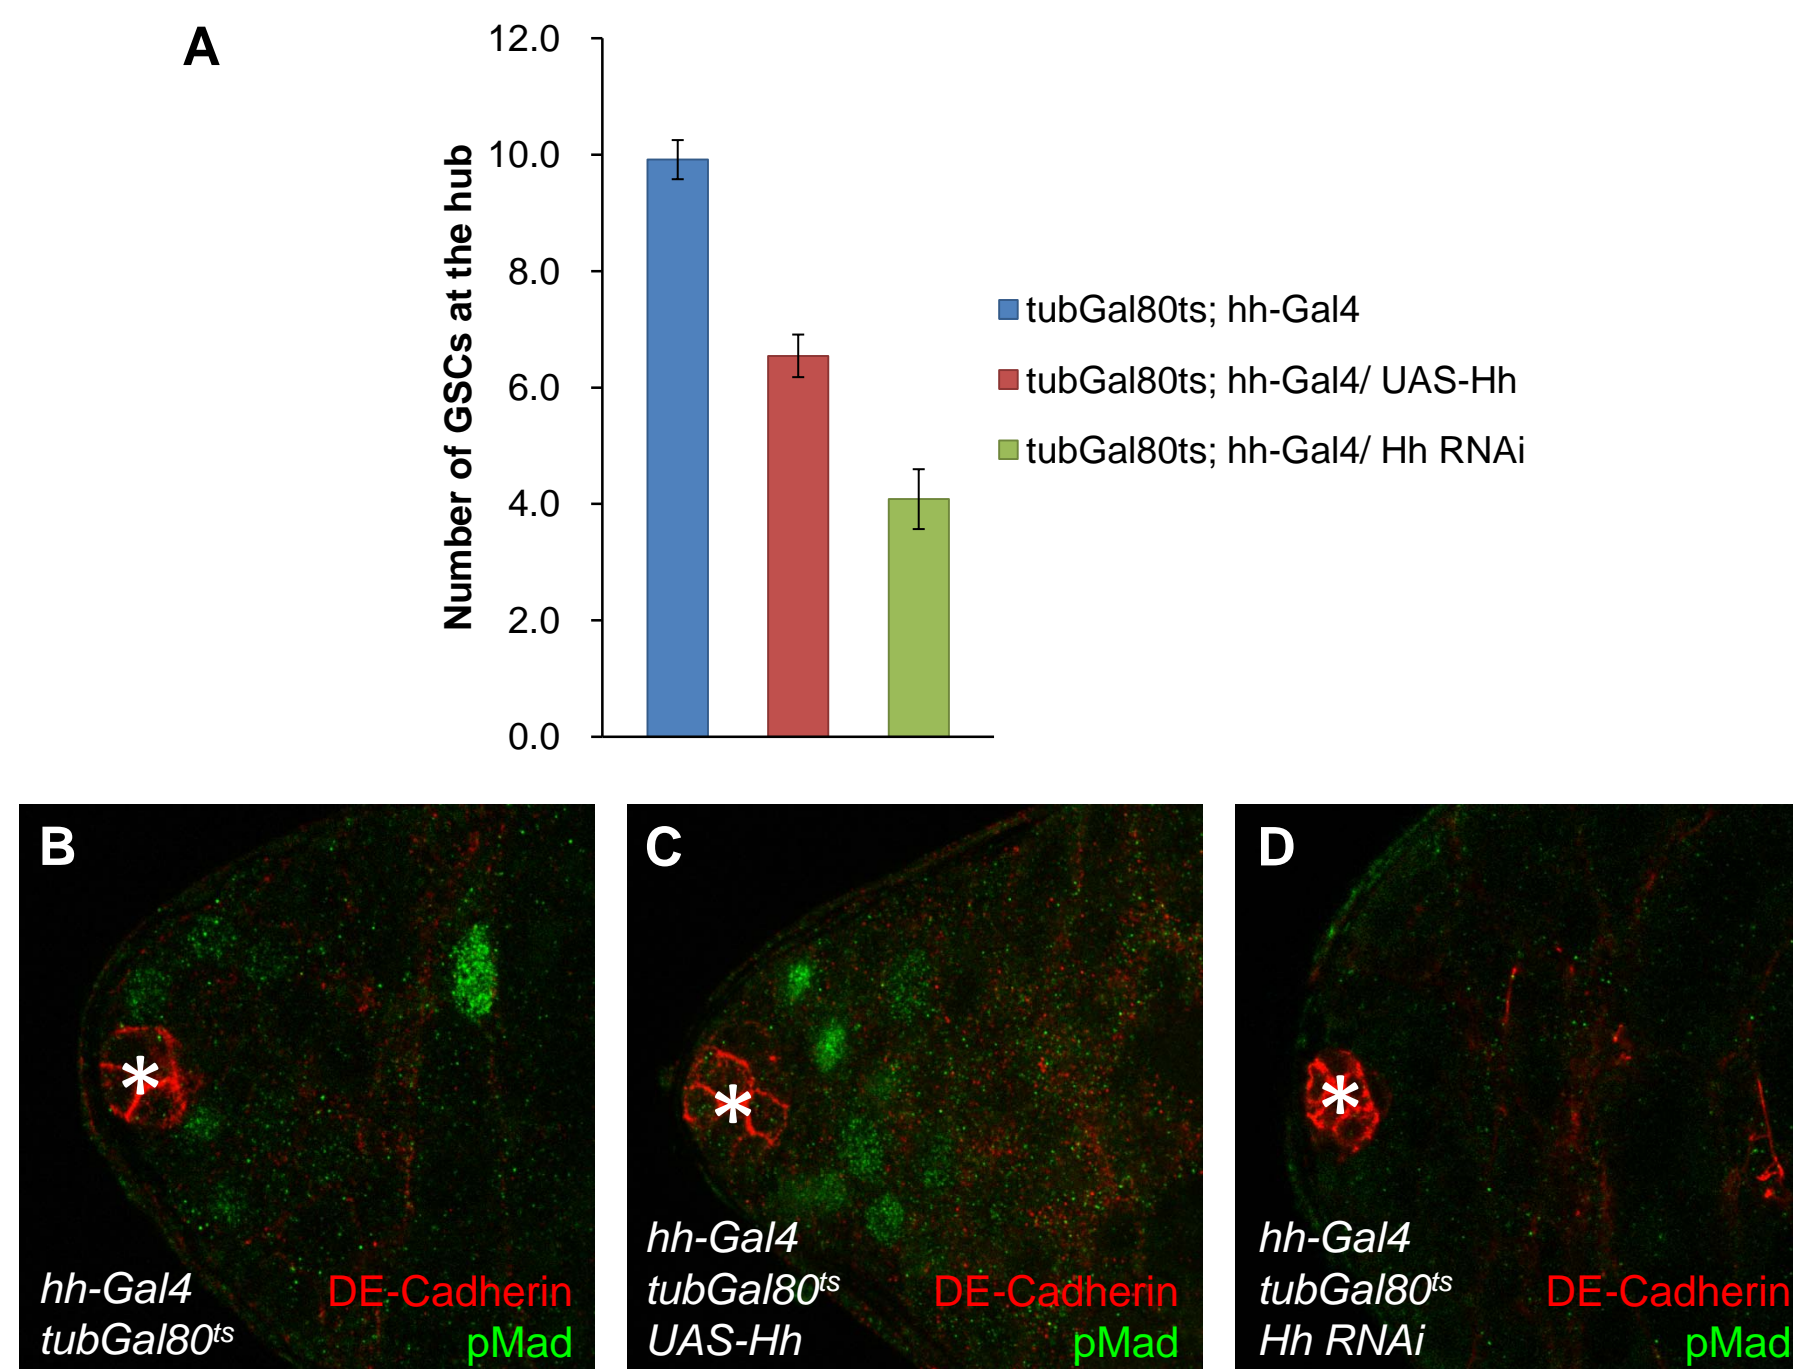

### Figure S7 Hh levels in the hub cells influence GSCs maintenance.

(A) The numbers of GSCs at the hub are counted in indicated testes. Both overexpress and knock down Hh ligands in hub cells decrease GSC number. Data are presented as Mean  $\pm$  SEM,  $n \geq 10$ . (B-D) Indicated testes are immunostained to show pMad (green) and DE-Cadherin (red). *Hh RNAi* in the hub reduces pMad staining (D) and Hh overexpression increases pMad signal (C). All the apexes of testes are positioned to the left and asterisks indicate the hub cells.
